# Supplementary figures and images for: Liquid metal electrode-enabled flexible microdroplet sensor
Source: Royal Society of Chemistry journal article supplement (doi:10.1039/c9lc00995g), 2019-12-06

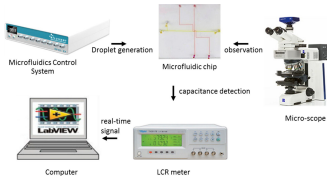

Supplement: c9lc00995g2.pdf [file c9lc00995g2.pdf]
